# Supplementary material for: Genomic DNA transposition induced by human PGBD5
Source: eLife journal article supplement (doi:10.7554/elife.10565), 2015-09-24
Supplement: supp [file elife-10565-supp-v1.zip]

**Supplementary Table 1: Sequences of PCR primers**

| <b>Name</b>  | <b>Description</b>                          | <b>Sequence (5'-3')</b>         |
|--------------|---------------------------------------------|---------------------------------|
| PGBD5_qpcr_F | qPCR of PGBD5, forward primer               | GCTTATTCTTCAGCGCATCC            |
| PGBD5_qpcr_R | qPCR of PGBD5, reverse primer               | CAGCCTCTGGGTCAGACAAT            |
| NTerm_qPCR_F | qPCR of PGBD5 N-terminus, forward primer    | AGAACATGGTGGTGCAGACA            |
| NTerm_qPCR_R | qPCR of PGBD5 N-terminus, reverse primer    | GGAGATCATGTAGCCCAGGA            |
| TniPB_qPCR_F | qPCR of T.ni. piggyBac, forward primer      | TGAGCATGGTGTACGTGTCC            |
| TniPB_qPCR_R | qPCR of T.ni. piggyBac, reverse primer      | CAGGAACATCACCTGCGACA            |
| PB_ExPCR_F   | Excision PCR assay, forward primer          | GGTTCGCGCACATTTCC               |
| PB_ExPCR_R   | Excision PCR assay, reverse primer          | CAGTCATCCTCGGCAAACCTCTTT        |
| PB_qPCR_F    | qPCR of transposon reporter, forward primer | GATGTCGTGTACTGGCTCCG            |
| PB_qPCR_R    | qPCR of transposon reporter                 | CGCGTGAAGGAGAGATGCGAG           |
| TK1_qPCR_F   | qPCR of TK1, forward primer                 | ATGCTGATGTCTGGGTAGGGTG          |
| TK1_qPCR_R   | qPCR of TK1, reverse primer                 | TGAGTCAGGAGCCAGCGTATG           |
| Bio-linear   | FLEA-PCR                                    | [BioTEG]CATTTTGA CT CACGCGGTCGT |
| Anchor       | FLEA-PCR                                    | GTGGCACGGACTGATC N N N N N(N-Q) |
| Exponential  | FLEA-PCR                                    | GTGGCACGGACTGCA                 |
| Transposon1  | FLEA-PCR                                    | ATTGACAAGCACGCCTCACG            |
| Transposon2  | FLEA-PCR                                    | ATGCACAGCGACGGATTCCG            |
