# Supplementary material for: Genomic DNA transposition induced by human PGBD5
Source: eLife journal article supplement (doi:10.7554/elife.10565), 2015-09-24
Supplement: supp [file elife-10565-supp-v1.zip]

## Transfection of:

- 1) transposase cDNA
- 2) transposon reporters encoding *NeoR* gene

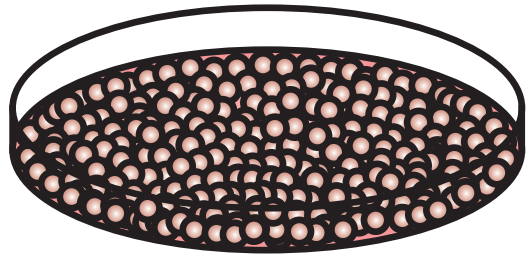

HEK293 cells

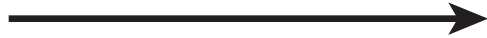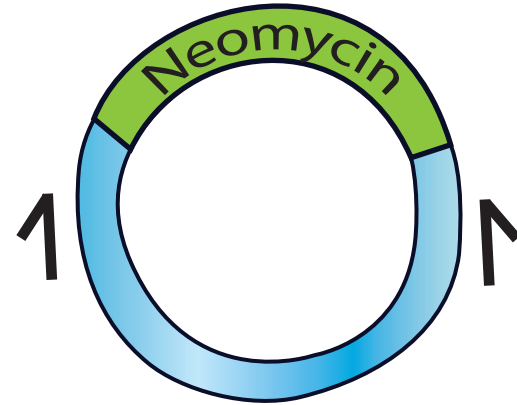

Intact plasmid

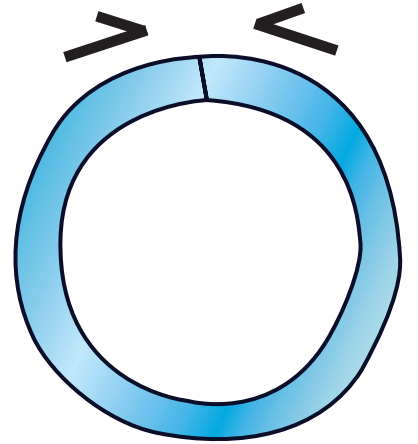

Excised  
transposon

PCR
