# Supplementary material for: Genomic DNA transposition induced by human PGBD5
Source: eLife journal article supplement (doi:10.7554/elife.10565), 2015-09-24
Supplement: supp [file elife-10565-supp-v1.zip]

Danio rerio -----  
Xenopus tropicalis -----  
Homo sapiens -----  
Mus musculus -----  
Gallus gallus -----  
Python bivittatus MALHTHRGLRCGEREAGLRGGGGGGGSGGGADVSPACLPPSVTEPFLLLGCCLRPAD

Danio rerio -----MAEC----GRRGLSLLEEARSRYESLQISDDVFGESGDDS-SENPF  
Xenopus tropicalis -----MMKGASLSGSGGGGNKKIALSLLEAARSRYESLQISDDLFGESGDDSSSGNPF  
Homo sapiens -----  
Mus musculus -----  
Gallus gallus -----  
Python bivittatus PTERGRLLTPPAEMMAEGGGGQ---RLKGAARCRYESLQISDDVFGESGQDS-SGNPF

Danio rerio YSTTGDSNSDNYPETNADDA-----RVNE  
Xenopus tropicalis YSTSPDSPTSASGCSEDEDGGGRKTPHPLGQCEVGELGKNVGDGLGNSTPHGTPRVKG  
Homo sapiens -----  
Mus musculus -----  
Gallus gallus -----  
Python bivittatus YSTTAESRSASE---EDEEVEGE-TPE-GGRSHRGRTGGRQGS-----KASAA---EE

Danio rerio TRSQ-SCV-----PPGSVSSGQAQEEGWGDTLRDLSLPHYQ  
Xenopus tropicalis KEVQRDCTERDTVGESLLHRERTVTRCEEGDAEQQVPIDNLKEEEGWSHTLQDRAAPYFS  
Homo sapiens -----MPDYRTR-----ALFVQSTLGDS-AG-----PELQLLSIVPGRDLQPSD  
Mus musculus -----  
Gallus gallus -----  
Python bivittatus QEEEEQQQPQQQVL-----GGLEASFLGPA-EQQPREEEGERGWSQSLRNTPTPSFK

Danio rerio DTHGPTQKMSATATAMDDFFQLFVPDNVIONMVTQTNMYAKKFQERFGSDEGWTNVTLAEM  
Xenopus tropicalis DTSGPTRNMPEPTSSVMDFFQLFVPDNVKNMVTQTNMYAKKYQERFGSDDAWTDVTLAEM  
Homo sapiens SFTGPTRKMPPSASAVDDFFQLFVPDNVLKNMVVQTNMYAKKFQERFGSDGAWVEVTLTEM  
Mus musculus -----MPPSASAVDDFFQLFVPDNVLKNMVVQTNMYARKFQERFGSDGAWVEVTLAEM  
Gallus gallus -----MPLTASAMDDFFQLFVPDNVLKNMVVQTNMYAKKYQERFGSDDTWIDVTLTEM  
Python bivittatus DSSGPTRKMPPTASAMDDFFQLFVPDNVLKNMVIQTNMYATKYQERFGSDEAWMDVTLTEI  
\* ::::\*\*\*\*\*::\*\* \*\*\*\*\* \*.\*\*.\* \*\* \* :\*:\*:\*

Danio rerio KAFLGYVTSTSVNRCSVLSIWSSGFFSNRSIALKMSQARFEKILKYFHVVAFRSSQGG  
Xenopus tropicalis KYFLGYMISTSTHHCESVLSIWSSGFYSNRSIALIMTQRFEEKILKYFHI VAFRSSQT-T  
Homo sapiens KAFLGYMISTSTSHCESVLSIWSSGFYSNRSIALVMSQARFEKILKYFHVVAFRSSQT-T  
Mus musculus KAFLGYVISTSVSHCESVLSIWSSGFYSNRSIALVMSQARFEKILKYFHVVAFRSSQT-T  
Gallus gallus KAFLGYMISTSIHHCESVLSIWSSGFYSNKSIALIMTQSRFEKILKYFHI VAFRSSQT-T  
Python bivittatus KAFLAYMISTSTHHCESVLSIWSSGFYSNKSIALIMTQTRFEKILKYFHI VAFRSSQT-T  
\* \*\* \* : \*\* :\*\*\*\*\*.\*\*:\*:\*:\*\* \*.\* \*\*\*\*\*:\*\*\*\*\* :

Danio rerio QGLYKIQPFLLSLQQSFSSSFPSQTQVLHEPLIDEPVFIATCTERELRKRKRKFSW  
Xenopus tropicalis HGLYKIQPFLLSLQNCFDSCFKPSQTQVLHEPLIDEPVFIATCTERELRKRKRKFSVW  
Homo sapiens HGLYKVQPFLLSLQNSFDSAFRPSQTQVLHEPLIDEPVFIATCTERELRKRKRKFSW  
Mus musculus HGLYKVQPFLLSLQSGFDAFRPSQTQVLHEPLIDEPVFIATCTERELRKRKRKFSW  
Gallus gallus HGLYKIQPFLLSLQNGFDSAFRPSQAQVLHEPLIDEPVFIATCTERELRKRKRKFSW  
Python bivittatus HGLYKIQPFLLSLQHSFDSAFKPSQTQVLHEPLIDEPVFIATCTERELRKRKRKFSW  
:\*\*\*:\*\*\*\*\* \*:\*:\*:\*:\*\*\*\*\*:\*\*\*\*\*:\*\*\*\*\*:\*\*\*\*\*:\*

Danio rerio VRQCSSTGFICQIYVHLKEGGPGDGLDTLKNKPQLHSLVAKQLCQNLAGRNAIIFTGPSI  
Xenopus tropicalis VRQCSSTGFICQVYIHLKEGSATDGLDTLKNKPQLHRMVAKNLQCNAAAGKNYIIFTGPSI  
Homo sapiens VRQCSSTGFIIQIYVHLKEGGPGDGLDALKNKPQLHSMVARSLCRNAAGKNYIIFTGPSI  
Mus musculus VRQCSSTGFIIQIYVHLKEGGPGDGLDALKNKPQLHSMVARSLCRNAAGKNYIIFTGPSI  
Gallus gallus VRQCSSTGFICQIYVHLKEGSGADGLDALKNKPQLHSMVAKSLCQNASKNYIIFTGPSI  
Python bivittatus VRQCSSTGFICQIYAHLKEGSGTEGLDALKNAQLHSIVAKSLCQNVTGKNCIIFTGPSI  
\*\*\*\*\* \*: \* \*\*\*\*\* . :\*:\*:\*\* \* \*:\*:\*:\*: \*: \* \*\*\*\*\*

Danio rerio TSLNLFQEFQKGIYCCGLLSIRKSDCTGLPQSMINTTEAPQQRQSHVKNRGNMSIINW  
Xenopus tropicalis TSFSLFEEFEKQGIYCCGLLSRKS SDCTGLPSPMSLNTTEVPQARGQYAIRVKNMSLICW  
Homo sapiens TSLTLTFEEFEKQGIYCCGLLRARKS SDCTGLPLSMLTNPATPPARGQYIKMKGNMSLICW  
Mus musculus TSLNLFEEFEKQGIYCCGLLSRKS SDCTGLPSPMLTNPATPLARGQYIQTGKNMSLICW  
Gallus gallus TSLNLFEEFEKQIYCCGLLSARKSDCTGLPSPMLNPDTPQSRGQYIRMKGNMSLICW  
Python bivittatus TSLNLFEEFEKQDIHCCGLLSARKSDCTGLPSPMLNPNPETPQSRGHYRIKMKGNMSLICW  
\*\*.:\*:\*:\*\*\*\*\* \*.\*\*\*\*\* \*\*\*\*\* \*\* \* . \* \*\*: : : \*\*\*\*\* \*

Danio rerio YNKGNFRFLTNAYSPTKEGVIIKRKS GEIPCLAVEAFAAHLSYICKYDDKYSKYFIFHK  
Xenopus tropicalis YNRGYFRFLTNAYSSIQQGVIIKRKS GEIPCLAVEAFAAHLSYICKYDDKYSKYFISHK  
Homo sapiens YNKGHFRFLTNAYS PVQQGVIIKRKS GEIPCLAVEAFAAHLSYICRYDDKYSKYFISHK  
Mus musculus YNKGHFRFLTNAYS PVQKGVIIKRKS GEIPCLAVEAFAAHLSYICRYDDKYSKYFISHK  
Gallus gallus YNKGHFRFLTNAYS PVQQGVIIKRKS GEIPCLAVEAFAAHLSYICKYDDKYSKYFISHK  
Python bivittatus YNKGYFRFLTNAYS PVQQGVIIKRKS GEIPCLAVEAFAAHLSYICRYDDKYSKYFISHK  
\*\*:\* \*\*\*\*\* :\*:\*\*\*\*\*:\*\*\*\*\*:\*\*\*\*\*:\*\*\*\*\*:\*\*\*\*\* \*

Danio rerio PNKTWQQVFWLTISIAINNAYILYKMSDAYHVVKYRSRAQFGERLVKELLDMDDCSPQT  
Xenopus tropicalis PNKTWQQVFWFTISIAINNAYILYKMSDAYHVVKYRSRAQFGDRLVRELLGLEDTS PCH  
Homo sapiens PNKTWQQVFWFAISIAINNAYILYKMSDAYHVVKYRSRAQFGERLVRELLGLEDASPTH  
Mus musculus PNKTWQQVFWFAISIAINNAYILYKMSDAYHVVKYRSRAQFGERLVRELLGLEDSSPAH  
Gallus gallus PNKTWQQVFWFAISIAINNAYILYKMSDAYHVTRYRSRAQFGERLVKELLGLEDTS PSH  
Python bivittatus PNKTWQQVFWFISISIAINNAYILYKMSDAYPMKKYSRVQFGERLVKELLGLEDSPSGH  
\*\*\*\*\*:\*\*\*\*\*:\*\*\*\*\*.\* \*:\*:\*\*.\*\*:\*:\*\* \*: \* :\*
