# Supplementary figures and images for: Genomic DNA transposition induced by human PGBD5
Source: eLife journal article supplement (doi:10.7554/elife.10565), 2015-09-24

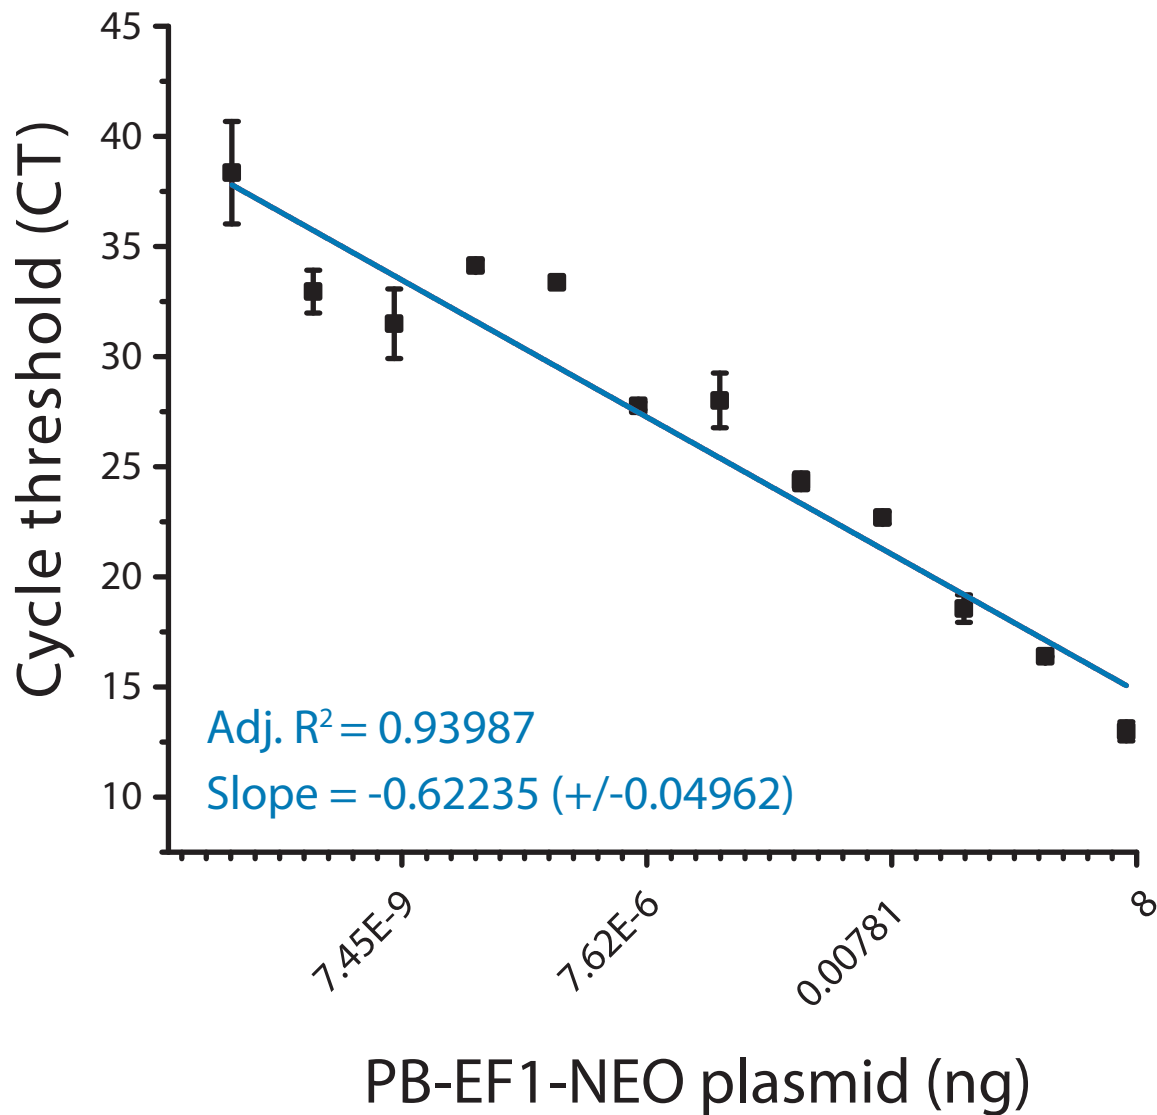

Supplement: supp [file elife-10565-supp-v1.zip]

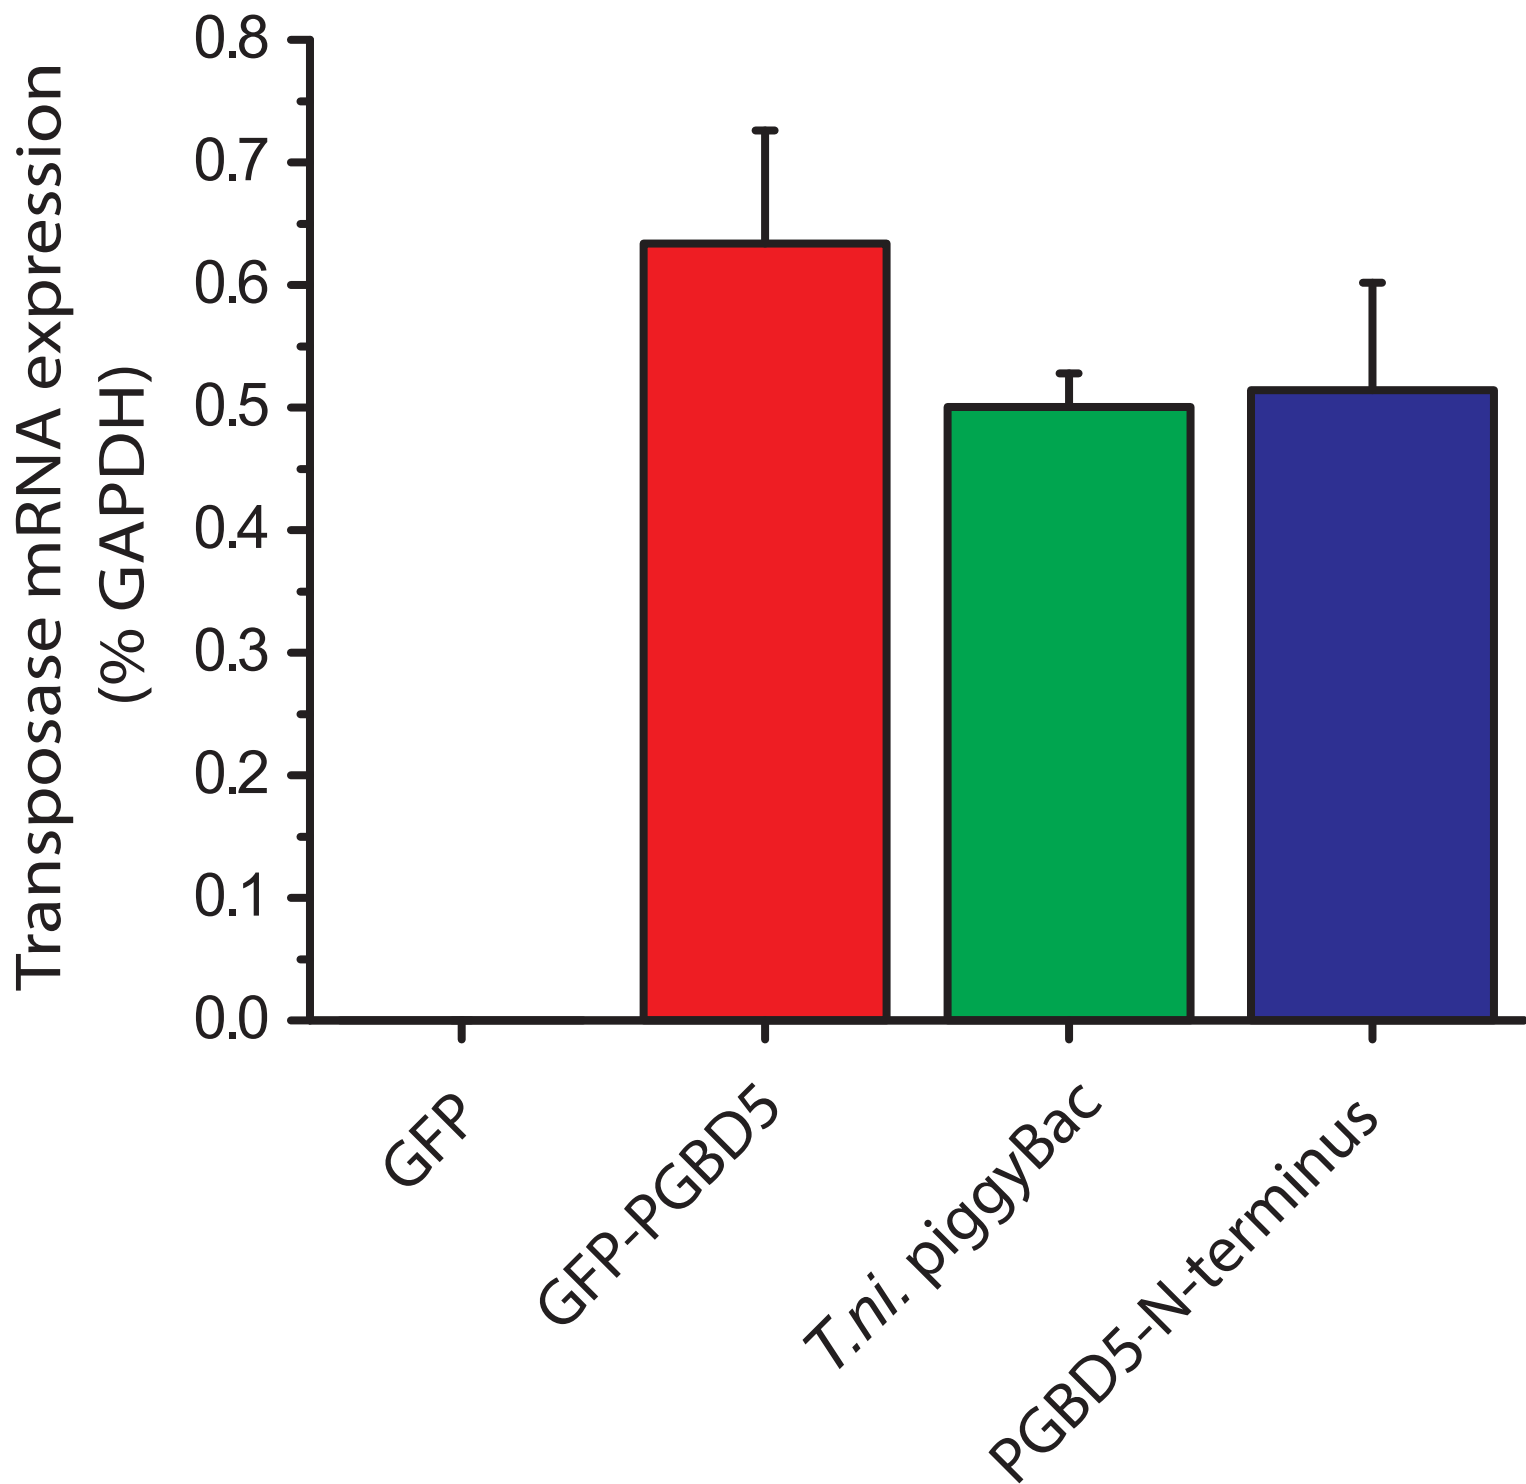

Supplement: supp [file elife-10565-supp-v1.zip]

5'ITR

*NeoR*

3'ITR

Intact transposon

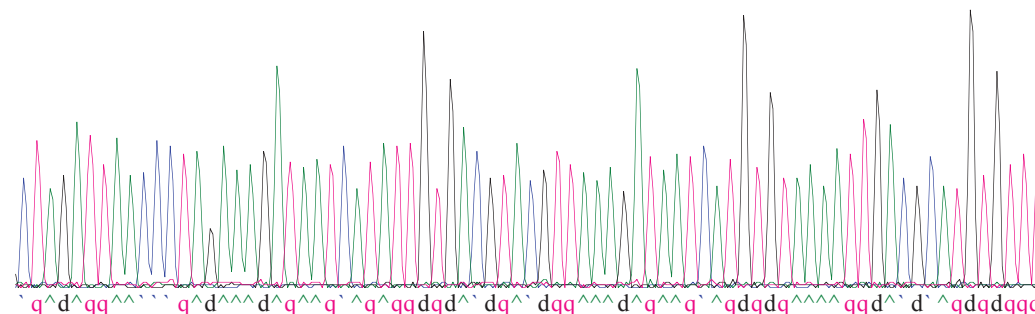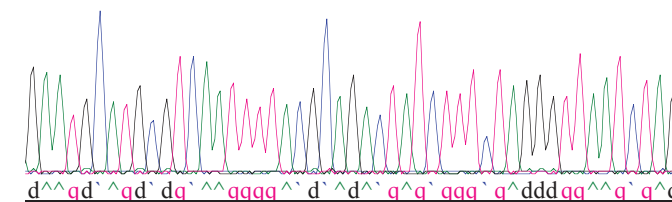

Deleted transposon

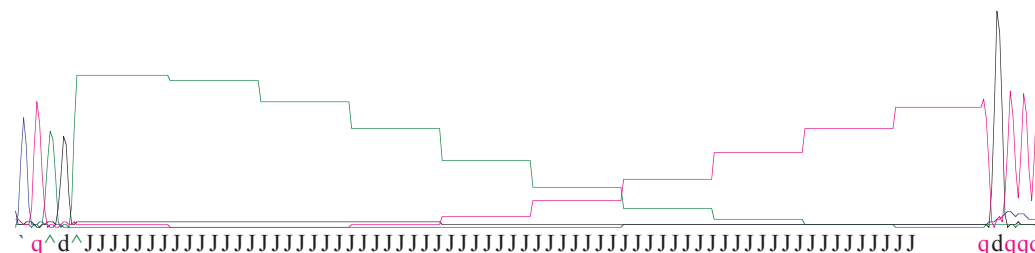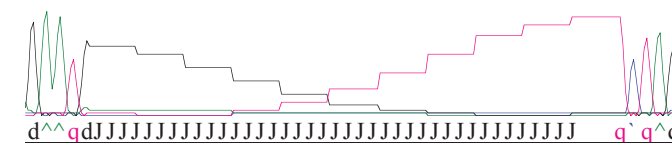

Mutant transposon

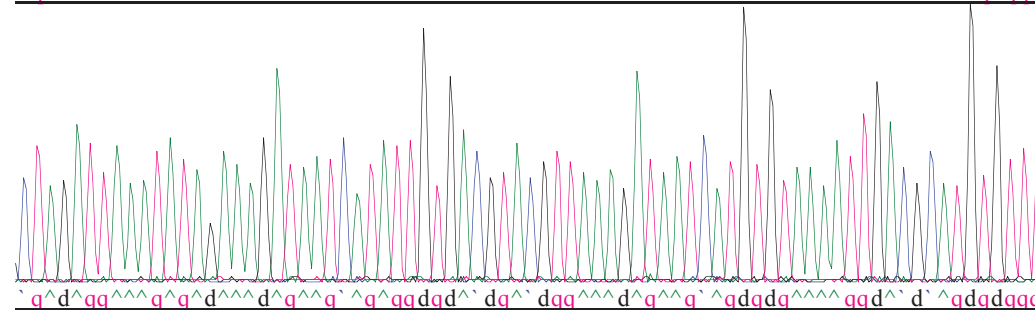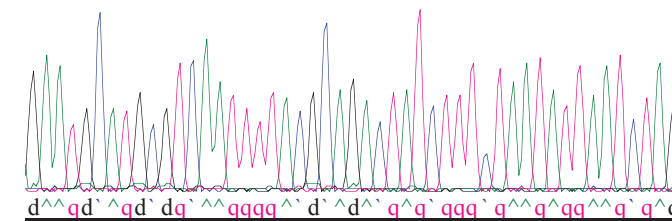

CCC>ATA

GGG>ATA

Supplement: supp [file elife-10565-supp-v1.zip]

|                   |   |   |   |   |   |   |
|-------------------|---|---|---|---|---|---|
| Intact transposon | - | + | + | - | + | - |
| Mutant transposon | - | - | - | + | - | + |
| T.ni. PiggyBac    | - | - | + | + | - | - |
| GFP-PGBD5         | - | - | - | - | + | + |
| GFP               | - | + | - | - | - | - |

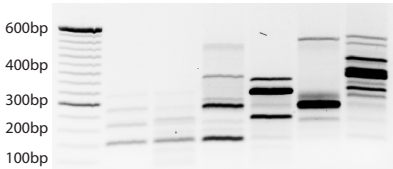

Supplement: supp [file elife-10565-supp-v1.zip]
